# Supplementary material for: Burn Severity and Postfire Salvage Logging Effects on Vegetation and Soil System in a Short-Term Period in Mediterranean Pine Forests
Source: MDPI journal article supplement (doi:10.3390/fire7040127), 2024-04-09
Supplement: s1 [file s1]

Table S1.- Inventory of species within the study area.

| Scientific name                    | Scientific name               | Scientific name                   |
|------------------------------------|-------------------------------|-----------------------------------|
| <i>Allium sativum</i>              | <i>Dorycnium pentaphyllum</i> | <i>Pallenis spinosa</i>           |
| <i>Andryala ragusina</i>           | <i>Dorycnium hirsutum</i>     | <i>Petrorhagia nanteuillii</i>    |
| <i>Aphyllanthes monspeliensis</i>  | <i>Echium vulgare</i>         | <i>Phillyrea angustifolia</i>     |
| <i>Argyrolobium zanonii</i>        | <i>Erodium malacoides</i>     | <i>Pinus halepensis</i>           |
| <i>Asperula aristata</i>           | <i>Festuca sp.</i>            | <i>Pinus pinaster</i>             |
| <i>Asphodelus albus</i>            | <i>Filago pyramidata</i>      | <i>Pistacia lentiscus</i>         |
| <i>Asterolinon linum-stellatum</i> | <i>Foeniculum vulgare.</i>    | <i>Plantago albicans</i>          |
| <i>Astragalus sp.</i>              | <i>Fumana ericoides</i>       | <i>Poa bulbosa</i>                |
| <i>Atractylis humilis</i>          | <i>Fumana hispidula</i>       | <i>Quercus coccifera</i>          |
| <i>Avena sativa</i>                | <i>Gallium verticillatum</i>  | <i>Reseda luteola</i>             |
| <i>Biscutella auriculata</i>       | <i>Genista scorpius</i>       | <i>Retama sphaerocarpa</i>        |
| <i>Bituminaria bituminosa</i>      | <i>Geum sylvaticum</i>        | <i>Rubia peregrina</i>            |
| <i>Bombycilaena erecta</i>         | <i>Helianthemum capitata</i>  | <i>Ruta graveolens</i>            |
| <i>Brachypodium phoenicoides</i>   | <i>Helianthemum asperum</i>   | <i>Salvia rosmarinus</i>          |
| <i>Brachypodium retusum</i>        | <i>Helianthemum capitatum</i> | <i>Salvia verbenaca</i>           |
| <i>Bromus rubens</i>               | <i>Helianthemum syriacum</i>  | <i>Sanguisorba minor</i>          |
| <i>Bryum bicolor</i>               | <i>Helichrysum stoechas</i>   | <i>Santolina chamaecyparissus</i> |
| <i>Carex halleriana</i>            | <i>Hippocrepis ciliata</i>    | <i>Scorpiurus muricatus</i>       |
| <i>Centaurea aspera</i>            | <i>Holcus lanatus</i>         | <i>Scorzonera albicans</i>        |
| <i>Centaurea melitensis</i>        | <i>Hyparrhenia hirta.</i>     | <i>Scorzonera angustifolia</i>    |
| <i>Cistus clusii</i>               | <i>Juniperus oxycedrus</i>    | <i>Senecio vulgaris</i>           |
| <i>Cistus albidus</i>              | <i>Lactuca serriola</i>       | <i>Sonchus sp.</i>                |
| <i>Cistus monspeliensis</i>        | <i>Leontodon taraxacoides</i> | <i>Staelina dubia</i>             |
| <i>Cistus populifolius</i>         | <i>Leuzea conifera</i>        | <i>Stipa offneri</i>              |
| <i>Cistus salvifolius</i>          | <i>Linaria sp.</i>            | <i>Stipa phoenicoides</i>         |
| <i>Convolvulus althaeioides</i>    | <i>Linum suffruticosum</i>    | <i>Teucrium pseudochamaepitys</i> |
| <i>Corix monspeliensis</i>         | <i>Lithodora fruticosa</i>    | <i>Thapsia villosa</i>            |
| <i>Coronilla juncea</i>            | <i>Medicago arvensis</i>      | <i>Thesium divaricatum</i>        |
| <i>Coronilla scorpioides</i>       | <i>Moricandia arvensis</i>    | <i>Thymus vulgaris</i>            |
| <i>Crepis vesicaria</i>            | <i>Misopates orontium.</i>    | <i>Trifolium arvense</i>          |
| <i>Cynara humilis</i>              | <i>Ononis minutissima</i>     | <i>Vicia sativa</i>               |
| <i>Daphne gnidium</i>              | <i>Ononis spinosa</i>         | <i>Vinca pervinca</i>             |
| <i>Daucus carota</i>               | <i>Ononis tridentata</i>      |                                   |
